1 **Title:**

2 Odonata diversity of the eastern region of Bangladesh with four new addition to the  
3 Bangladeshi dragonfly fauna

4 **Author names and affiliations**

5 Md Kawsar Khan <sup>1,2\*</sup>,

6 1. Department of Biochemistry and Molecular Biology, School of Life Sciences,  
7 Shahjalal University of Science and Technology, Sylhet-3114, Bangladesh.

8 2. Department of Biological Sciences, Macquarie University, Sydney, New South  
9 Wales- 2109, Australia

10 **Corresponding author**

11 Md Kawsar Khan

12 Department of Biochemistry and Molecular Biology

13 School of Life Sciences, Shahjalal University of Science and Technology

14 Sylhet-3114, Bangladesh.

15 Phone: +610415159836

16 Email: [kawsar.khan@mq.edu.au](mailto:kawsar.khan@mq.edu.au)

17 **Keywords:** Bangladesh, Dragonfly, Damselfly, Indo-Burma biodiversity hotspot, Odonata  
18 diversity

19 **Running Title:** Dragonflies of the eastern region of Bangladesh

20 **Abstract:**

21 A study was conducted in the eastern region to contribute to the Odonata fauna of  
22 Bangladesh. A total of 76 species belonging to 9 families have been recorded during the  
23 study period of April 2014 to July 2016. Three Zygopteran species e.g, *Ceriagrion rubiae*,  
24 *Calicnemia imitans*, *Prodasineura autumnalis* and one Anisopteran species e.g,  
25 *Megalogomphus smithii* have been newly discovered from Bangladesh. *Megalogomphus*  
26 genus have been first time recorded from Bangladesh.

27

28

29

30

31

32

33

34

35

36

37

38

39

40

41

42

43 **1.0 Introduction:**

44 Bangladesh, situated in the South East Asia, possesses an enormous area of wetlands  
45 including ponds, rivers, freshwater lakes and marshes along with extensive mangrove  
46 swamps. Moreover, the hilly areas of the north east and south east region receive  
47 precipitation throughout the year and are rich in waterfalls and streams. In addition, during  
48 monsoon many paddy fields and irrigation channels hold water more than three months and  
49 generate numerous temporary water reservoirs. This diverse range of water resources offers  
50 ambient microhabitat for many Odonata species (Chowdhury & Mohiuddin 1994). Till  
51 date, 103 species of Odonates have been recorded from Bangladesh (Begum et al. 1977;  
52 Chowdhury & Akhteruzzaman 1983; Chowdhury & Mia 1989; Chowdhury & Mohiuddin  
53 1993; Noruma & Alam 1995; Chowdhury & Mohiuddin 2011; Khan, 2015a, 2015b).  
54 Among them, Seventy-six species from seven families have been reported from the north  
55 east region of Bangladesh (Khan 2015b). On the other hand, Ninety species have been  
56 reported from the south east region (Chowdhury & Mohiuddin 2011). However, the  
57 checklist of the eastern region is not comprehensive and many prospective habitats are yet  
58 to be explored.

59 The eastern region of Bangladesh is situated in the Indo-Burma Biodiversity Hotspot region  
60 and rich in diverse floral and faunal community. This region has a few semi evergreen  
61 forests and wildlife sanctuaries enriched with numerous streams and waterfalls. In addition  
62 to that, there are many marshes and lakes which provide ambient habitat for Odonates.  
63 However, despite being suitable habitat, till date scanty of studies have been carried out to  
64 annotate the Odonata fauna of the eastern region. Moreover, the previous research

65 initiatives left many potential habitat to survey. The current study is a comprehensive  
66 approach for the documentation of the Odonata diversity of the eastern region of  
67 Bangladesh.

## 68 **2.0 Materials and Methods:**

### 69 **2.1 Study area:**

70 The odonates were surveyed the entire Sylhet division and the five districts e.g. Bandarban,  
71 Cox's Bazar, Chittagong, Khagrachari and Rangamati of Chittagong division (Figure 1). In  
72 the north east region which is administratively under Sylhet division, Odonates were  
73 surveyed notably in Khadimnagar National Park, Tilagar Eco Park, Shahjalal University of  
74 Science and Technology campus, Satchari National Park, Lawachara National Park,  
75 Madhobpur Lake etc. On the other hand, in the south east region which is administratively  
76 under Chittagong division, Odonates were surveyed in the Chittagong University campus,  
77 Kaptai National Park, Bariadhala National Park, many streams and waterfalls associated  
78 areas of Chittagong, Khagrachari, and Bandarban district.

### 79 **2.2 Specimen collection and identification:**

80 During the survey, the potential habitats like the marshes, ponds, streams, streams  
81 associated forest patches, temporary water sheds created during the monsoon were scanned  
82 thoroughly from 9.00 am to 4.00 pm. At field, the species were photographed for various  
83 identification keys using a Canon 600 DSLR camera (Canon Inc., Tokyo, Japan) fitted with  
84 a 55-250 mm telephoto zoom lens. The specimens were captured using an insect sweeping  
85 net and brought into the Department of Biochemistry and Molecular Biology, Shahjalal  
86 University of Science and Technology, Sylhet for further identification. In the laboratory,

87 the specimens were examined under the microscope and identified based on the available  
88 identification keys provided by Fraser (1933, 1934, 1936) and Asahina (1993). The  
89 specimens were deposited in the Department of Biochemistry and Molecular Biology,  
90 Shahjalal University of Science and Technology, Sylhet, Bangladesh. The Odonates were  
91 classified according to Dijkstra et al. (2013).

### 92 **3.0 Results:**

93 A total of 76 species from nine families belonging to 45 genera have been recorded from  
94 the eastern region of Bangladesh (Table 1; Figure 2). Among the documented Odonates,  
95 46.05% (35 species) of 18 genera belong to Zygoptera sub-order while the rest 53.95% (41  
96 species) of 27 genera belong to Anisoptera sub-order (Table 1). Libellulidae was the  
97 predominant Anisoptera family with 35 species from 22 genera (Table 1; Figure 2). On the  
98 other hand, Coenagrionidae was the best represented Zygoptera family with 19 species  
99 from 6 genera (Table 1; Figure 2). Four species (*Ceriagrion rubiae*, *Calicnemia imitans*,  
100 *Prodasineura autumnalis* and *Megalogomphus smithii*) have been recorded for the first  
101 time from Bangladesh.

102 A total of 66 species belonging to eight families have been recorded from the north east  
103 region. On the other hand, 52 species belonging to seven families have been documented  
104 from the south east region. Among the 76 recorded species, 41 species are found in the  
105 north east as well as in the south east region. Whereas, 24 species were recorded from the  
106 north east region only and 11 species were recorded from the south east part only.  
107 Coenagrionidae and Libellulidae were the best represented Zygopteran and Anisopteran  
108 family with 16 and 33 species respectively in the north east region. Similarly, in south east

109 region Coenagrionidae and Libellulidae were the best represented Zygopteran and  
110 Anisopteran family with 11 and 27 species respectively.

### 111 **Newly recorded Odonates for Bangladesh**

#### 112 **1. *Ceriagrion rubiae* Laidlaw, 1916 (Figure 3A)**

113 I have sighted *Ceriagrion rubiae* from the Shahjalal University of Science and Technology  
114 campus, Sylhet (24°92'112"N, 91°83'31"E) in June 2015. In May 2016, I have recorded  
115 this species again from the same location. The abdominal length and hind wing length of  
116 the male is 26-18 mm and 17-19 mm respectively. The male can be distinguished easily  
117 from the other *Ceriagrion* species by their bright, unmarked thorax and abdomen.  
118 Currently, this species is known from the geographical boundary of Bangladesh and India  
119 only.

#### 120 **2. *Calicnemia imitans* Lieftinck, 1948 (Figure 3B and 3C).**

121 *Calicnemia imitans* is one of the most abundant species in the southeastern hilly streams.  
122 They prefer stream associated shaded bushes for perching. This is third recorded species of  
123 this genus from Bangladesh after *C. eximia* and *C. pulverulans*. I have recorded this species  
124 from the Alutila Cave, Khagrachari, Chittagong (23°05'18"N, 91°57'24"E) in June 2015.  
125 The length of the male abdomen is 29-31 mm and hind wing length is 20-22mm. This  
126 species can be distinguished from the other species by its body coloration and anal  
127 appendages. The ground color of male is black, orange and red color is absent in the thorax,  
128 narrow straight blue antehumeral stripe present, inferior is two third of the superior, tip of  
129 the superior is wide apart. This species is known from Bangladesh (New record), India,

130 Laos, Myanmar, Thailand, Viet Nam (Fraser 1933; Hamalainen & Pinratana 1999; Cuong  
131 & Hoa 2007)

132 **3. *Prodasineura autumnalis* (Fraser, 1922) (Figure 3D, 3E)**

133 I have recorded this species from the Kaptai National Park, Rangamati, Chittagong  
134 (22°29'50"N, 92°11'05"E) in October 2014. I have re-sighted this species later in June 2015  
135 from Richang waterfalls, Khagrachari, Chittagong (23°06'38"N, 91°93'10"E), and Debota  
136 Pond, Khagrachari, Chittagong, (23°0'56"N, 91°58'18"E). The length of the abdomen and  
137 hind wing of the male is 30-31 mm and 18-20 mm respectively. *Prodasineura autumnalis*  
138 is superficially similar to *Prodasineura verticalis* and *Prodasineura sita*, however, they can  
139 be distinguished by the unmarked black thorax and the white tipped inferior anal  
140 appendages (Figure 3F). The females are found close to males and can be distinguished by  
141 blue antehumeral stripe (Figure 3 G). The species was previously known from China, India,  
142 Indonesia, Laos, Malaysia, Myanmar, Nepal, Singapore, Thailand and Vietnam (Fraser  
143 1933; Vick 1989; Hamalainen & Pinratana 1999; Wilson & Reels 2003; Orr 2005; Cuong  
144 & Hoa 2007; Wilson 2005; Tang et al. 2010). The present record extened its distribution to  
145 Bangladesh also.

146 **4 *Megalogomphus smithii* (Selys, 1854) (Figure 3F)**

147 *Megalogomphus smithii* was previously known from Assam, India which is the adjacent to  
148 the north eastern region of Bangladesh. Considering to the similarity of habitats, this  
149 species was predicted to be present in Bangladesh also. I have recorded this species from  
150 Khadimnagar National Park Sylhet, Bangladesh (24°57'05" N, 91°55'05") in April 2015.

151 The abdominal length of the male is 53-55 mm and the hind wing is 42-44 mm. This  
152 species has a prominent M shape marking in the thorax, and can easily be separated from  
153 the other member of the genus by the yellow marked black legs.

#### 154 **4.0 Discussion:**

155 In current study, Odonata fauna of the eastern region of Bangladesh have been documented.  
156 A total of 76 species from 40 genera have been recorded. Among them, four species and  
157 one genus have been recorded for the first time from Bangladesh. With the addition of this  
158 four species the current checklist of the Odonata fauna of Bangladesh is raised to 109  
159 species. The high rate of the new record is a good indication that the Odonata fauna  
160 Bangladesh is poorly understood and demands more studies. Moreover, considering the  
161 habitat and Odonata fauna known from adjacent states of India e.g. Assam, Meghalaya,  
162 West Bengal and Myanmar, it can be predicted that more Odonata species should be  
163 present in Bangladesh.

164 Regional checklist is a good indicator of the diversity of particular faunal community, their  
165 distribution range, and population fragmentation. Hence, updating regional checklist on a  
166 regular basis is a good practice to understand the conservational status of a species. In  
167 current study, three species (*Agriocnemis clauseni*, *Pseudagrion spencei* and *Tramea*  
168 *Virginia*) are newly added to the odonata fauna of the north east region. In addition to that,  
169 the current study has extended distribution range of a few previously recorded species. The  
170 distribution range extension and new habitat allocation is particularly important to assesses  
171 the national status of those species and also for the IUCN Red Listed globally data  
172 deficient, endemic and endangered species. In current study, distribution range has been



173 extended for two globally data deficient species. Among them, *Macrogomphus robustus*  
174 have been previously recorded from Lawachara National Park, Maulavibazar (Chowdhury  
175 & Mohiuddin 2011). The present record extends its distribution further north to the  
176 Khadimnagar National Park, Sylhet. The other data deficient species, *Megalogomphus*  
177 *smithii* have been previously known from China, India, and Indonesia. The present study  
178 reported this species for the first time within the geographical area Bangladesh. The  
179 individual number of this two data deficient species recorded from the current study is very  
180 low and thus long-term studies are essential to assess their population trends and  
181 distribution range.

182 In conclusion, the diverse Odonata fauna of the eastern region and newly recorded species  
183 of the area indicates it may accommodate hitherto unknown species. Moreover, the current  
184 study suggests that more long-term surveys are required to annotate the Odonata fauna of  
185 Bangladesh, to estimate their current status and to determine conservation needs.

186 **Funding:** The project was supported by Rufford Foundation (Rufford Small Grant ID:  
187 186971).

188 **Acknowledgements:** I am very thankful to two anonymous reviewer for their comments  
189 on the initial version of the manuscript. I am also thankful to Payal Barua, Tabrakullah  
190 Ranu, Nur Ahad Shah, Shuvo Sutradhar, Rumana yesmin Trisha and Rakhil Chandra Das  
191 for their support during the field study. I would also like to acknowledge Noppadon  
192 Makbun and Rupa Saha for their support during in taxonomy and in manuscript preparation  
193 respectively.

194 **References:**

- 195 Asahina, S. (1993). A List of the Odonata from Thailand: Parts I-XXI. Bangkok, Thailand:  
196 Bosco Offset.
- 197 Bedjanič, M., Conniff, K., Van der Poorten, N., and Šalamun, A. (2014). Dragonfly fauna  
198 of Sri Lanka: distribution and biology, with threat status of its endemics. Pensoft  
199 publishers.
- 200 Begum, A., Bashar. M.A., Dutta, AK., & L.C. Bashak (1977). A Systematic note on the  
201 Dragonflies of Dhaka City and its suburbs. Journal of Asiatic Society Bangladesh 2: 43-45.
- 202 Chowdhury, S.H., M. Akhteruzzaman (1983). Dragonflies (Anisoptera, Odonata) of  
203 Chittagong University Campus, Bangladesh. Chittagong University Studies, Part II 7: 39 -  
204 48.
- 205 Chowdhury, S.H., & M.I. Mia (1989). Notes on some damselflies (Odonata, Zygoptera) of  
206 Chittagong University Campus. Chittagong University Studies, Part II 13: 65- 70.
- 207 Chowdhury, S.H., & M. Mohiuddin (1993). New Dragonflies from Chittagong University  
208 Campus. Bangladesh Journal of Zoology 21:149 -150.
- 209 Chowdhury. S.H., & M. Mohiuddin (1994). Dragonfly Phenology – A mechanism for  
210 optimal habitat utilization. In Srivastava VK, editor. Advances in Oriental Odonatology:  
211 Proceedings of IV South Asian Symposium of Odonatology 1992; 10-12 October 1992;  
212 Allahabad, India. Cherry publications: 47-54.

- 213 Chowdhury, S.H., & M. Mohiuddin (2011). A check-list of the Odonata from the eastern  
214 region of Bangladesh with some taxonomic notes. *University Journal of Zoology, Rajshahi*  
215 *University* 30: 61- 66.
- 216 Cuong, D.M., & D.T.T. Hoa (2007). Checklist of dragonfly from Vietnam. Hanoi,  
217 Vietnam: Hanoi National University.
- 218 Dijkstra, K.D.B., Kalkman, V.J., Dow, R.A., Stokvis, F.R., & J. van Tol (2013). Redefining  
219 the damselfly families: the first comprehensive molecular phylogeny of Zygoptera  
220 (Odonata). *Systematic Entomology* 39: 68- 96.
- 221 Fraser, F.C. (1933). *The Fauna of British India including Ceylon and Burma. Odonata -*  
222 *Vol. I.* London, UK: Taylor and Francis Ltd.
- 223 Fraser, F.C. (1934). *The Fauna of British India including Ceylon and Burma. Odonata -*  
224 *Vol. II.* London, UK: Taylor and Francis Ltd.
- 225 Fraser, F.C. (1936). *The Fauna of British India including Ceylon and Burma. Odonata -*  
226 *Vol. III.* London, UK: Taylor and Francis Ltd.
- 227 Hämäläinen, M., & R.A. Müller (1997). Synopsis of the Philippine Odonata, with lists of  
228 species recorded from forty islands. *Odonatologica* 26: 249-315.
- 229 Hamalainen, M., & A. Pinratana (1999). *Atlas of the Dragonflies of Thailand.* Bangkok,  
230 Thailand: Brothers of St. Gabriel.

- 231 Khan, M.K. (2015a). *Gynacantha subinterrupta* Rambur, 1842: an addition to the odonates  
232 (Insecta: Odonata: Aeshnidae) of Bangladesh. *Journal of Threatened Taxa* 7:7704-7705;  
233 <http://dx.doi.org/10.11609/JoTT.o4276.7704-5>.
- 234 Khan, M.K. (2015b). Dragonflies and damselflies (Insecta: Odonata) of the northeastern  
235 region of Bangladesh with five new additions to the Odonata fauna of Bangladesh. *Journal*  
236 *of Threatened Taxa* 7: 7795-7804; <http://dx.doi.org/10.11609/JoTT.o4314.7795-804>.
- 237 Lieftinck, M.A. (1934). An annotated list of the Odonata of Java, with notes on their  
238 distribution, habits and life-history. *Treubia* 14: 377-462.
- 239 Mitra, T.R. (2002). Geographical distribution of Odonata (Insecta) of Eastern India.  
240 *Memoirs of the Zoological Survey of India* 19: 1-208.
- 241 Noruma, S., & M.Z. Alam (1995). A list of dragonflies collected in Bangladesh. *Esakia* 35:  
242 135-140.
- 243 Orr, A.G. (2005). *Dragonflies of Peninsular Malaysia and Singapore*. Borneo, Malaysia:  
244 Natural History Publications.
- 245 Steinmann, H. (1997). *World Catalogue of Odonata- Vol. II*. New York, USA: Walter de  
246 Gruyter.
- 247 Tang, H.B., Wang, L.K., & M. Hämäläinen (2010). A photographic guide to the dragonflies  
248 of Singapore. Raffles Museum of Biodiversity Research, National University of Singapore.
- 249 Vick, G.S. (1989). *List of the Dragonflies Recorded from Nepal: With a Summary of Their*  
250 *Altitudinal Distribution (Odonata)*. Flumserberg Scientific Publications.

251 Wilson, K.D.P., & G.T. Reels (2003). Odonata of Guangxi Zhuang Autonomous Region,  
252 China, part I: Zygoptera. *Odonatologica* 32: 237-279.

253 Wilson, K.D.P. (2005). Odonata of Guangxi Zhuang Autonomous Region, China, part II:  
254 Anisoptera. *International Journal of Odonatology* 8: 107-168.

255 Yokoi, N. (1999). Dragonflies of central Laos in mid-summer. *Gekkan-Mushi*: 2-7.

256 **Table:**

257 **Table 1:** A list of the Anisoptera and Zygoptera species recorded in current study. The  
258 species newly discovered from Bangladesh are shown in asterisks (\*). The species present  
259 in a particular area shown by tick sign (√) and the absent species are shown by cross mark  
260 (X).

261 **Figures:**

262 **Figure 1.** A reference map of the eastern region of Bangladesh. The north east region is  
263 administratively under Sylhet division and the south east is under Chittagong division. The  
264 red color and green color represents the area covered during the study period.

265 **Figure 2.** Number of Odonata species and their corresponding families recorded from the  
266 eastern region of Bangladesh during present study.

267 **Figure 3.** Photographs of the Zygoptera and Anisoptera species first time recorded from  
268 Bangladesh in present study. 3A. *Ceriagrion rubiae* Laidlaw, 1916 (male) 3B. *Calicnemia*  
269 *imitans* (male), 3C. *Calicnemia imitans* (female), 3D. *Prodasineura autumnalis* (male), and

270 3E. *Prodasineura autumnalis* (male and female in tandem position), 3F. *Megalogomphus*

271 *smithii* (male)

272

273

274

275

276

277

278 **Table 1:** A list of the Anisoptera and Zygoptera species recorded in current study. The  
 279 species newly discovered from Bangladesh are shown in asterisks (\*). The species present  
 280 in a particular are shown by tick sign (√) and the absent species are shown by cross mark  
 281 (X).

282

| Species name                                               | Recorded<br>from north<br>east | Recorded from<br>south east | Habitat feature      |
|------------------------------------------------------------|--------------------------------|-----------------------------|----------------------|
| <b>Lestidae</b>                                            |                                |                             |                      |
| <b>01</b> <i>Lestes praemorsus</i> Hagen in<br>Selys, 1862 | √                              | X                           | Paddy field,<br>Pond |
| <b>Calopterygidae</b>                                      |                                |                             |                      |

|                        |                                                    |   |   |                       |
|------------------------|----------------------------------------------------|---|---|-----------------------|
| <b>02</b>              | <i>Neurobasis chinensis</i><br>(Linnaeus, 1758)    | X | √ | Stream,<br>Waterfalls |
| <b>03</b>              | <i>Vestalis gracilis</i> (Rambur,<br>1842)         | √ | √ | Forest, Stream        |
| <b>Chlorociphidae</b>  |                                                    |   |   |                       |
| <b>04</b>              | <i>Aristocypha quadrimaculata</i><br>(Selys, 1853) | √ | √ | Stream,<br>Waterfalls |
| <b>05</b>              | <i>Libellago lineata</i><br>(Burmeister, 1839)     | √ | √ | Stream                |
| <b>Euphaeidae</b>      |                                                    |   |   |                       |
| <b>06</b>              | <i>Euphaea ochracea</i><br>Selys, 1859             | X | √ | Stream                |
| <b>Platycnemididae</b> |                                                    |   |   |                       |
| <b>07</b>              | <i>Calicnemia imitans</i><br>Lieftinck, 1948*      | X | √ | Stream                |
| <b>08</b>              | <i>Coeliccia bimaculata</i><br>Laidlaw, 1914       | √ | X | Forest                |
| <b>09</b>              | <i>Coeliccia didyma</i> (Selys,<br>1863)           | X | √ | Forest, Stream        |
| <b>10</b>              | <i>Prodasineura autumnalis</i><br>(Fraser, 1922)*  | X | √ | Stream                |
| <b>11</b>              | <i>Prodasineura laidlawii</i>                      | √ | X | Stream, Forest        |

|                            |                                                     |   |   |                             |
|----------------------------|-----------------------------------------------------|---|---|-----------------------------|
| (Förster in Laidlaw, 1907) |                                                     |   |   |                             |
| <b>12</b>                  | <i>Prodasineura verticalis</i>                      | X | √ | Stream                      |
| (Selys, 1860)              |                                                     |   |   |                             |
| <b>13</b>                  | <i>Onychargia atrocyana</i>                         | √ | X | Lake, Forest                |
| Selys, 1865                |                                                     |   |   |                             |
| <b>14</b>                  | <i>Copera marginipes</i>                            | √ | √ | Stream, Forest              |
| (Rambur, 1842)             |                                                     |   |   |                             |
| <b>15</b>                  | <i>Copera vittata</i> (Selys, 1863)                 | √ | X | Stream                      |
| <b>16</b>                  | <i>Pseudocopera ciliata</i> (Selys, 1863)           | √ | √ | Lake, Marsh,<br>Pond        |
| <b>Coenagrionidae</b>      |                                                     |   |   |                             |
| <b>17</b>                  | <i>Agriocnemis clauseni</i> Fraser, 1922            | √ | X | Forest stream               |
| <b>18</b>                  | <i>Agriocnemis femina</i> (Brauer, 1868)            | √ | √ | Marsh, Pond                 |
| <b>19</b>                  | <i>Agriocnemis Kalinga</i> Nair & Subramanian, 2014 | √ | X | Lake, Marsh,<br>Pond        |
| <b>20</b>                  | <i>Agriocnemis lacteola</i> Selys, 1877             | √ | √ | Marsh, Pond,<br>Paddy field |
| <b>21</b>                  | <i>Agriocnemis pieris</i> Selys, 1877               | X | √ | Marsh, Pond,                |
| <b>22</b>                  | <i>Agriocnemis pygmaea</i>                          | √ | √ | Marsh, Pond                 |



|           |                                                        |   |   |                             |
|-----------|--------------------------------------------------------|---|---|-----------------------------|
|           | (Rambur, 1842)                                         |   |   |                             |
| <b>23</b> | <i>Ceriagrion cerinorubellum</i><br>(Brauer, 1865)     | √ | √ | Lake, Marsh,<br>Pond        |
| <b>24</b> | <i>Ceriagrion coromandelianum</i><br>(Fabricius, 1798) | √ | √ | Lake, Marsh,<br>Pond        |
| <b>25</b> | <i>Ceriagrion olivaceum</i><br>Laidlaw, 1914           | X | √ | Forest                      |
| <b>26</b> | <i>Ceriagrion rubiae</i> Laidlaw<br>1916*              | √ | X |                             |
| <b>27</b> | <i>Ischnura aurora</i> (Brauer,<br>1865)               | √ | √ | Marsh, Paddy<br>field       |
| <b>28</b> | <i>Ischnura rufostigma</i> Selys,<br>1876              | √ | X | Pond, Marsh,<br>Paddy field |
| <b>29</b> | <i>Ischnura senegalensis</i><br>(Rambur, 1842)         | √ | √ | Lake, Marsh,<br>Pond        |
| <b>30</b> | <i>Mortonagrion aborense</i><br>(Laidlaw, 1914)        | √ | X | Ditch, Pond                 |
| <b>31</b> | <i>Paracercion calamorum</i><br>(Ris, 1916)            | √ | X | Lake                        |
| <b>32</b> | <i>Paracercion malayanum</i><br>(Selys, 1876)          | √ | X | Lake                        |

|                     |                                                    |   |   |                              |
|---------------------|----------------------------------------------------|---|---|------------------------------|
| <b>33</b>           | <i>Pseudagrion microcephalum</i><br>(Rambur, 1842) | √ | √ | Lake, Pond                   |
| <b>34</b>           | <i>Pseudagrion rubriceps</i><br>Selys, 1876        | √ | √ | Lake, Marsh,<br>Pond, Stream |
| <b>35</b>           | <i>Pseudagrion spencei</i> Fraser,<br>1922         | √ | X | Lake                         |
| <b>Aeshnidae</b>    |                                                    |   |   |                              |
| <b>36</b>           | <i>Anax indicus</i> Lieftinck, 1942                | √ | X | Lake, Pond                   |
| <b>Gomphidae</b>    |                                                    |   |   |                              |
| <b>37</b>           | <i>Ictinogomphus rapax</i><br>(Rambur, 1842)       | √ | √ | Lake, Pond,                  |
| <b>38</b>           | <i>Macrogomphus montanus</i><br>Selys, 1869        | X | √ | Hilly Lake                   |
| <b>39</b>           | <i>Macrogomphus robustus</i><br>(Selys, 1854)      | √ | X | Forest stream                |
| <b>40</b>           | <i>Megalogomphus smithii</i><br>(Selys, 1854)*     | √ | X | Forest stream                |
| <b>41</b>           | <i>Paragomphus lineatus</i><br>(Selys, 1850)       | √ | √ | Forest edge,<br>Stream       |
| <b>Libellulidae</b> |                                                    |   |   |                              |
| <b>42</b>           | <i>Acisoma panorpoides</i><br>Rambur, 1842         | √ | √ | Marsh, Paddy<br>field,       |

|           |                                                      |   |   |                       |
|-----------|------------------------------------------------------|---|---|-----------------------|
| <b>43</b> | <i>Aethriamanta brevipennis</i><br>(Rambur, 1842)    | √ | √ | Forest edge,<br>Lake  |
| <b>44</b> | <i>Brachydiplax chalybea</i><br>Brauer, 1868         | √ | √ | Ditch Lake,<br>Pond   |
| <b>45</b> | <i>Brachydiplax farinosa</i><br>Kruger, 1902         | √ | √ | Ditch, Lake,<br>Pond, |
| <b>46</b> | <i>Brachydiplax sobrina</i><br>(Rambur, 1842)        | √ | √ | Ditch, Lake,<br>Pond, |
| <b>47</b> | <i>Brachythemis contaminata</i><br>(Fabricius, 1793) | √ | √ | Ditch, Lake,<br>Pond  |
| <b>48</b> | <i>Cratilla lineata</i> (Brauer,<br>1878)            | √ | √ | Forest                |
| <b>49</b> | <i>Crocothemis servilia</i> (Drury,<br>1770)         | √ | √ | Pond, Lake,<br>Stream |
| <b>50</b> | <i>Diplacodes nebulosa</i><br>(Fabricius, 1793)      | √ | X | Marsh, Paddy<br>field |
| <b>51</b> | <i>Diplacodes trivialis</i><br>(Rambur, 1842)        | √ | √ | Marsh, Paddy<br>field |
| <b>52</b> | <i>Hydrobasileus croceus</i><br>(Brauer, 1867)       | √ | X | Forest                |
| <b>53</b> | <i>Lathrecista asiatica</i><br>(Fabricius, 1798)     | √ | X | Forest                |

|           |                                                  |   |   |                            |
|-----------|--------------------------------------------------|---|---|----------------------------|
| <b>54</b> | <i>Neurothemis fulvia</i> (Drury, 1773)          | √ | √ | Forest, Lake               |
| <b>55</b> | <i>Neurothemis intermedia</i> (Rambur, 1842)     | √ | √ | Forest, Marsh              |
| <b>56</b> | <i>Neurothemis tullia</i> (Drury, 1773)          | √ | √ | Marsh, Paddy field, Pond   |
| <b>57</b> | <i>Orthetrum chrysis</i> (Selys, 1891)           | √ | √ | Forest                     |
| <b>58</b> | <i>Orthetrum glaucum</i> (Brauer, 1865)          | X | √ | Forest, Stream             |
| <b>59</b> | <i>Orthetrum luzonicum</i> (Brauer, 1868)        | √ | X | Forest                     |
| <b>60</b> | <i>Orthetrum pruinosum</i> (Burmeister, 1839)    | √ | √ | Marsh, Lake, Pond, Stream, |
| <b>61</b> | <i>Orthetrum sabina</i> (Drury, 1770)            | √ | √ | Marsh, Lake, Pond, Stream  |
| <b>62</b> | <i>Orthetrum triangulare</i> (Selys, 1878)       | √ | √ | Forest, Stream             |
| <b>63</b> | <i>Palpopleura sexmaculata</i> (Fabricius, 1787) | √ | √ | Forest edge, Lake          |
| <b>64</b> | <i>Pantala flavescens</i> (Fabricius, 1798)      | √ | √ | Marsh, Pond, Paddy field   |

|           |                                                        |   |   |                        |
|-----------|--------------------------------------------------------|---|---|------------------------|
| <b>65</b> | <i>Potamarcha congener</i><br>(Rambur, 1842)           | √ | √ | Lake, Pond             |
| <b>66</b> | <i>Rhodothemis rufa</i> (Rambur,<br>1842)              | √ | √ | Lake, Pond             |
| <b>67</b> | <i>Rhyothemis variegata</i><br>(Linnaeus, 1763)        | √ | √ | Marsh, Paddy<br>field  |
| <b>68</b> | <i>Tetrathemis platyptera</i><br>Selys, 1878           | √ | X | Forest                 |
| <b>69</b> | <i>Tholymis tillarga</i> (Fabricius,<br>1798)          | √ | X | Lake, Pond             |
| <b>70</b> | <i>Tramea basilaris</i> (Palisot de<br>Beauvois, 1805) | √ | √ | Forest edge            |
| <b>71</b> | <i>Tramea virginia</i> (Rambur,<br>1842)               | √ | X | Lake                   |
| <b>72</b> | <i>Trithemis aurora</i><br>(Burmeister, 1839)          | √ | √ | Hilly stream           |
| <b>73</b> | <i>Trithemis festiva</i> (Rambur,<br>1842)             | √ | √ | Stream                 |
| <b>74</b> | <i>Trithemis pallidinervis</i><br>(Kirby, 1889)        | √ | √ | Marsh, Lake,<br>Stream |
| <b>75</b> | <i>Urothemis signata</i> (Rambur,<br>1842)             | √ | √ | Marsh, Lake,<br>Pond   |

---

76 *Zyomma petiolatum*                      √                      X                      Forest

Rambur, 1842

---

283

284

285

286

287

288 Figure 1:

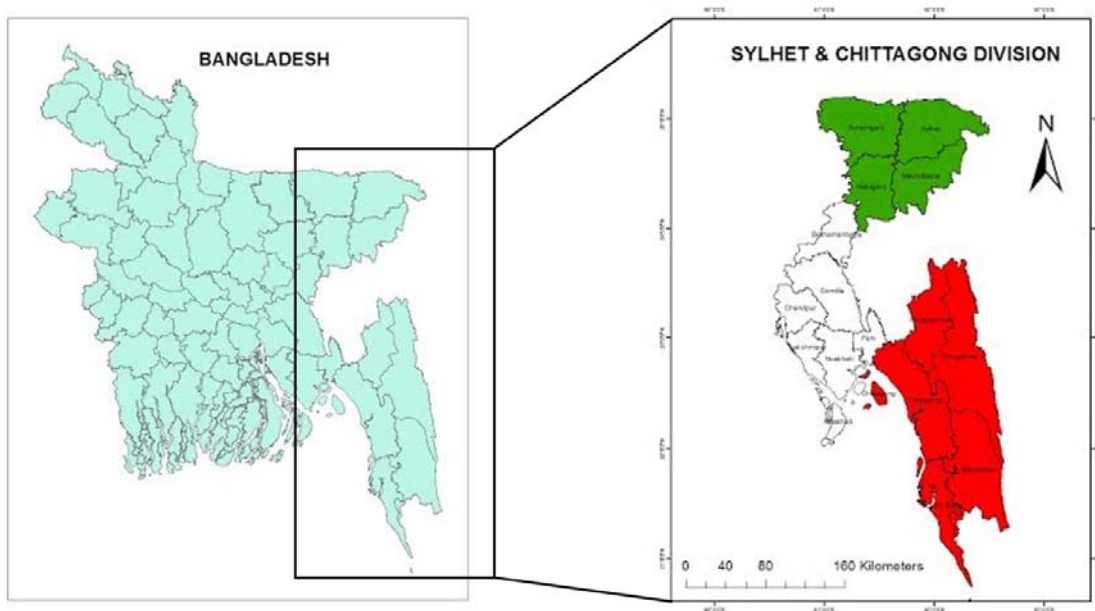

289

290 Figure 2:

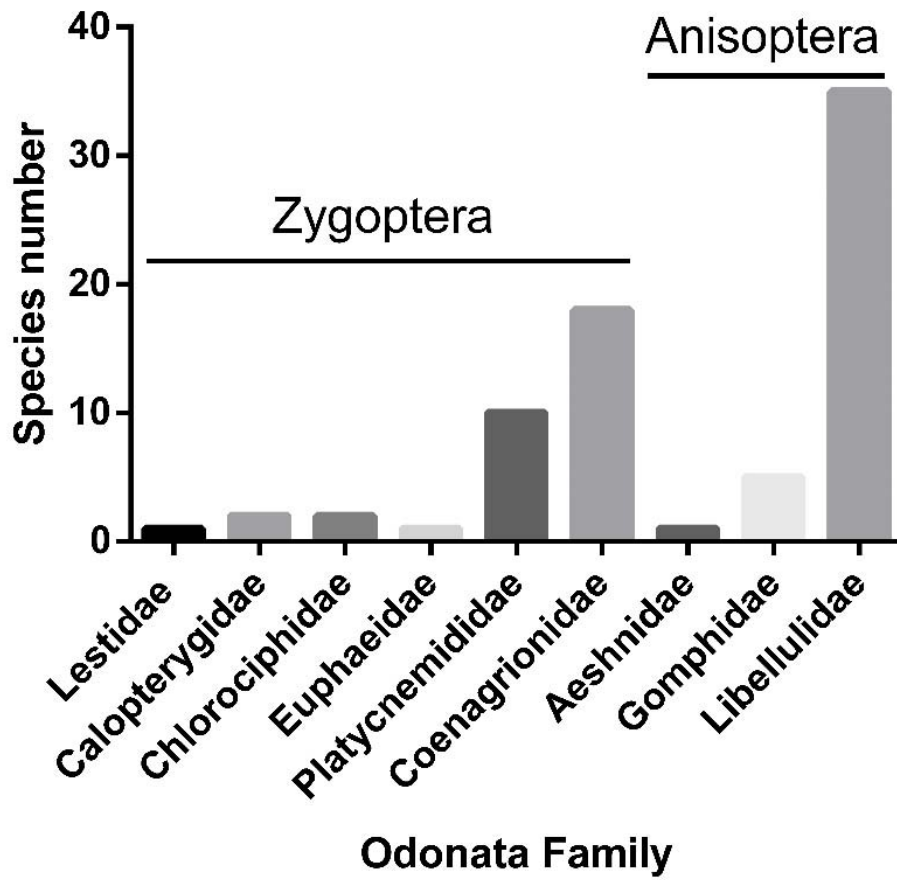

291

292

293 Figure 3A:

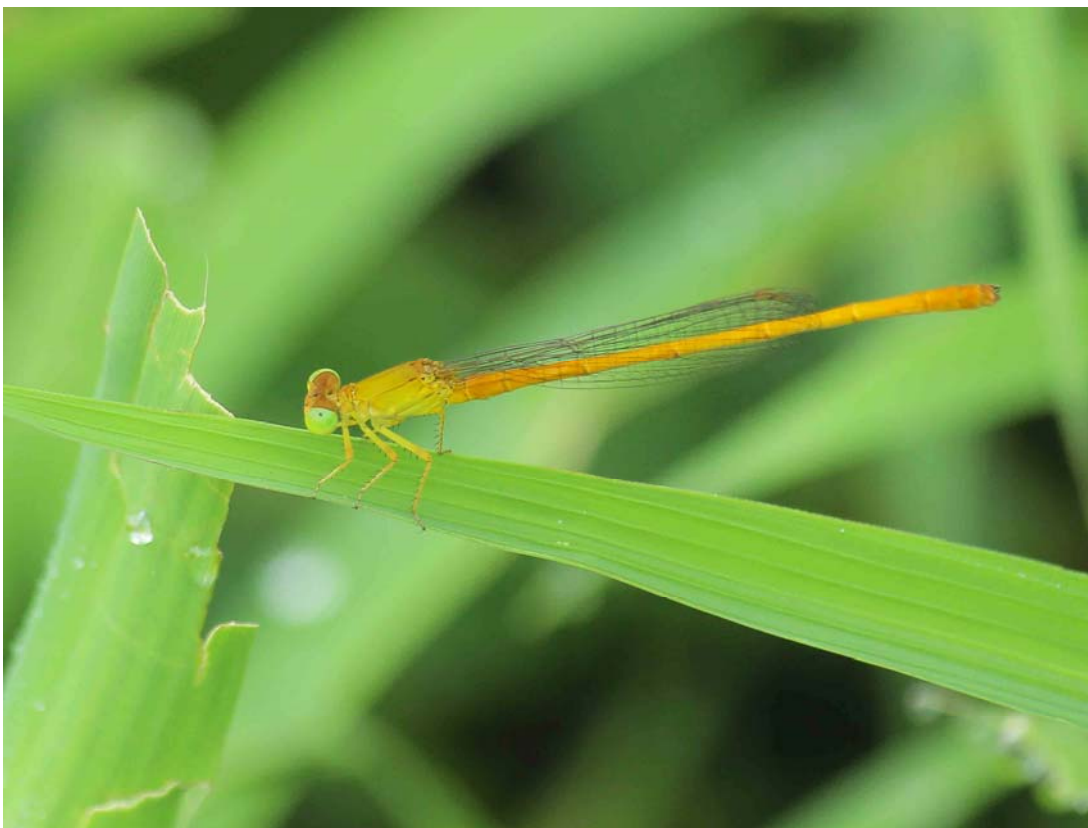

294

295 Figure 3B:



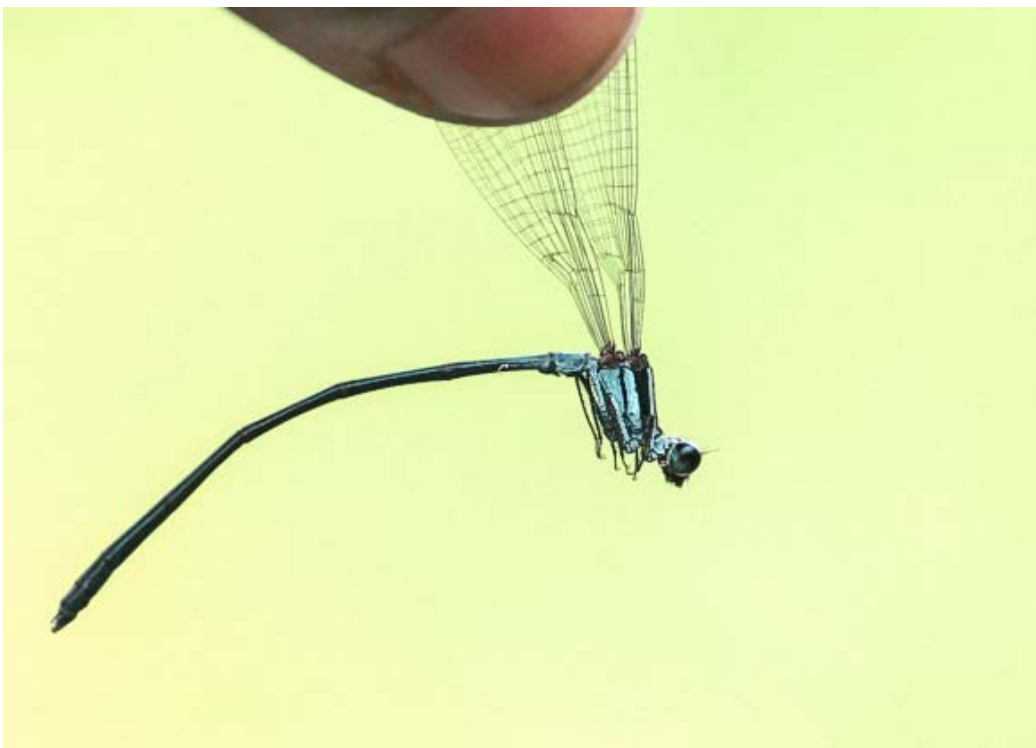

296

297 Figure 3C:

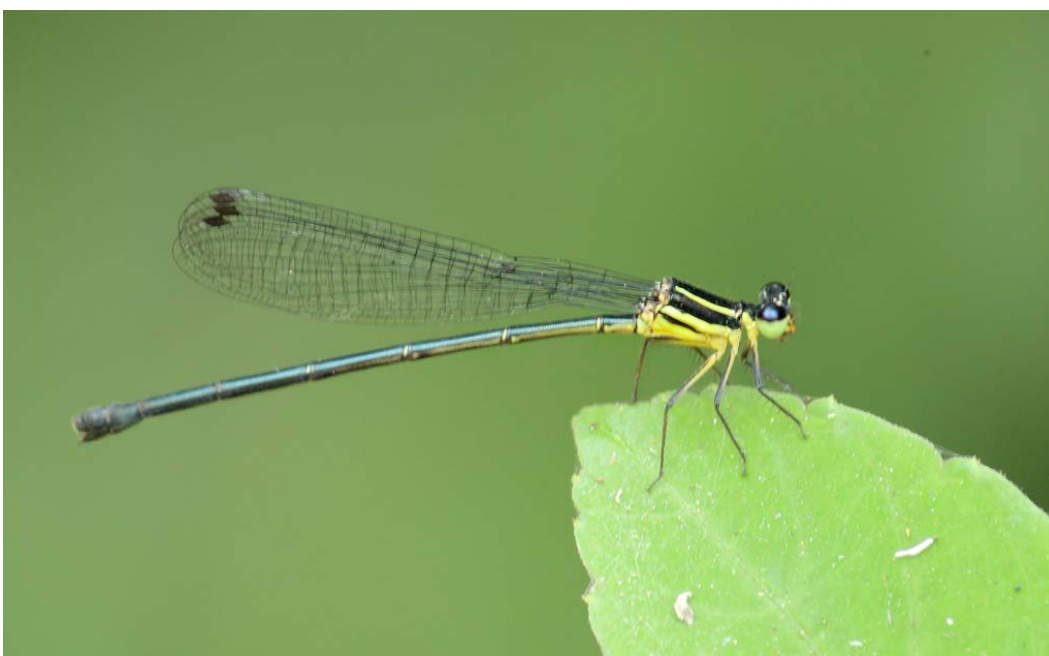

298

299 Figure 3D:

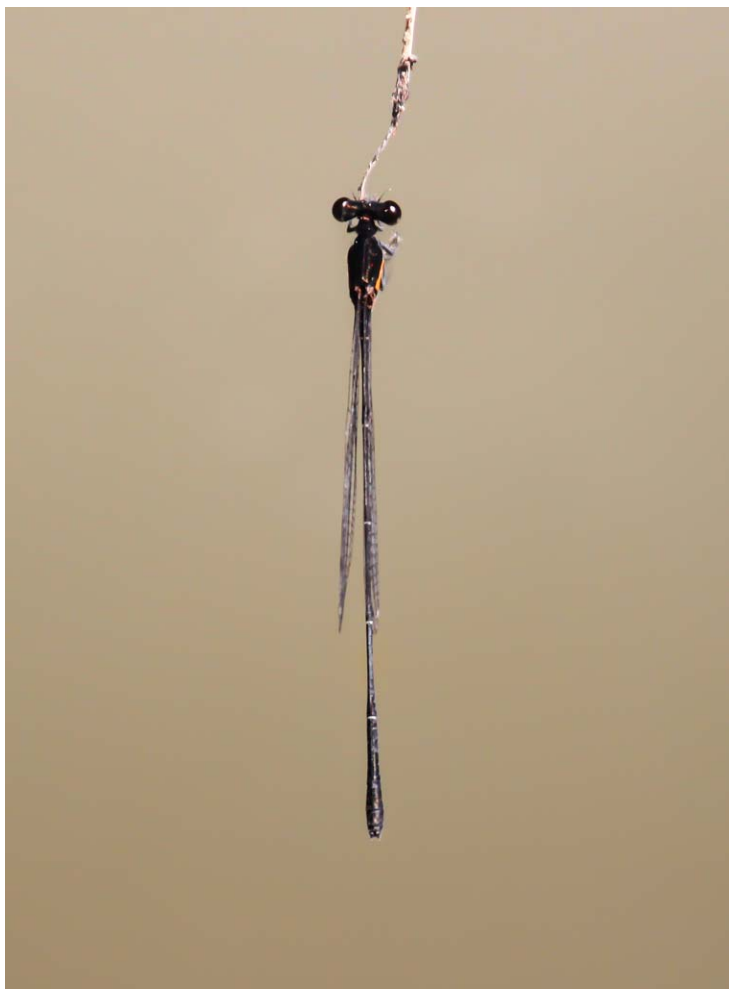

300

301 Figure 3E:

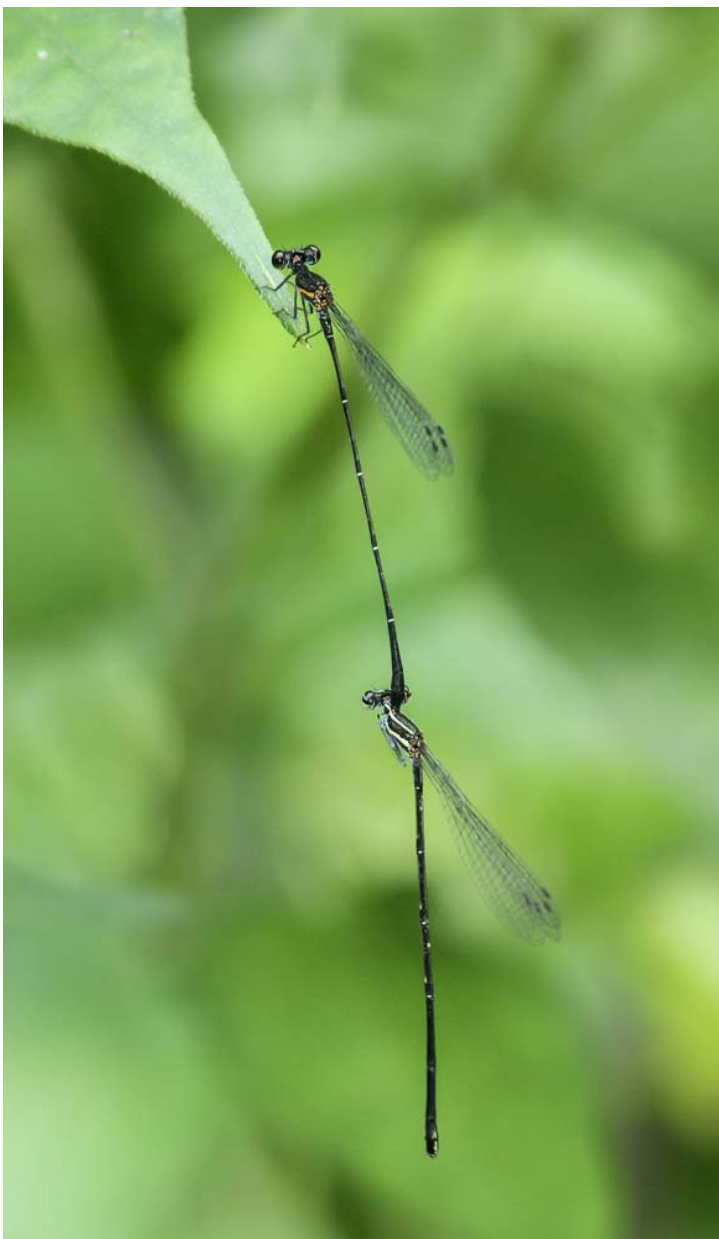

302

303 Figure 3F:

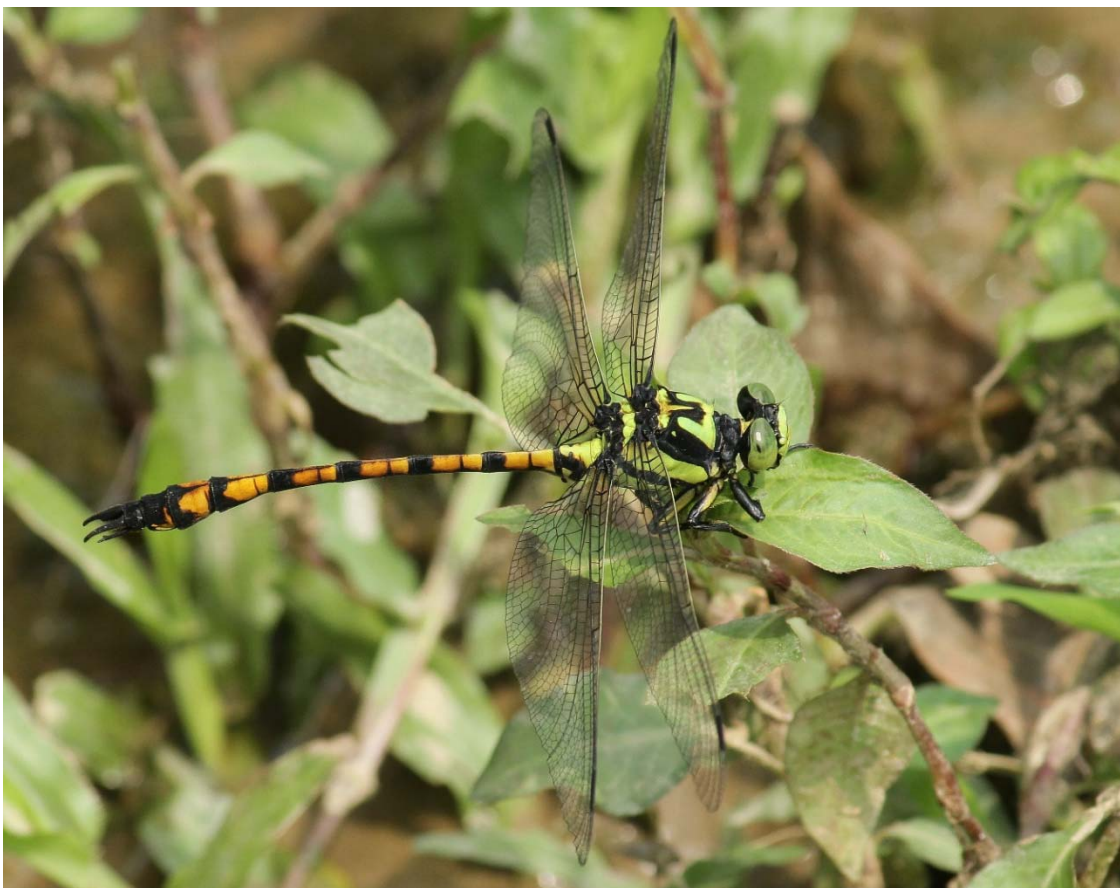

304

305

306

307

308
